# Supplementary material
Source: PubMed Central journal article supplement (PMC2878094)
Supplement: kwn036_1.pdf [file kwn036_1.pdf]

Online Table 3. Assessment of the effect of study characteristics on the association between human papillomavirus (HPV) persistence and CIN2-3/HSIL+, stratified by HPV-negative, transient HPV, and mixed HPV referent group.\*

| Study characteristic                | Design                      | HPV-negative referent                    |                         |                     |                           |                        |                                          | Mixed HPV referent      |                     |                           |                     | Transient HPV referent                   |                         |                     |                           |                       |
|-------------------------------------|-----------------------------|------------------------------------------|-------------------------|---------------------|---------------------------|------------------------|------------------------------------------|-------------------------|---------------------|---------------------------|---------------------|------------------------------------------|-------------------------|---------------------|---------------------------|-----------------------|
|                                     |                             | No. studies (homogeneity <i>p</i> value) | Summary effect estimate |                     | Ratio of effect estimates |                        | No. studies (homogeneity <i>p</i> value) | Summary effect estimate |                     | Ratio of effect estimates |                     | No. studies (homogeneity <i>p</i> value) | Summary effect estimate |                     | Ratio of effect estimates |                       |
|                                     |                             |                                          | Ratio                   | 95% CI <sup>†</sup> | Ratio                     | 95% CI <sup>†</sup>    |                                          | Ratio                   | 95% CI <sup>†</sup> | Ratio                     | 95% CI <sup>†</sup> |                                          | Ratio                   | 95% CI <sup>†</sup> | Ratio                     | 95% CI <sup>†</sup>   |
| Minimum HPV persistence             | ≤12 months                  | 6 (<0.001) <sup>a</sup>                  | 63.9                    | 7.9, 516.7          | 1.0                       |                        | 5 (<0.001) <sup>c</sup>                  | 21.5                    | 7.4, 62.1           | 1.0                       |                     | 8 (0.4) <sup>e</sup>                     | 9.5                     | 5.5-16.4            | 1.0                       |                       |
|                                     | >12 months                  | 2 (0.96) <sup>b</sup>                    | 223.0                   | 39.0, 1,273.3       | 3.3                       | 0.13, 84.0             | 5 (0.02) <sup>d</sup>                    | 50.0                    | 18.7, 134.1         | 2.4                       | 0.63, 8.9           | 4 (0.7) <sup>f</sup>                     | 42.9                    | 12.3-149.6          | 4.3                       | 1.0-18.0              |
| HPV testing interval                | ≤6 months                   | 3 (0.2) <sup>g</sup>                     | 29.0                    | 7.6, 110.7          | 1.0                       |                        | 3 (0.003) <sup>j</sup>                   | 18.7                    | 4.5, 77.6           | 1.0                       |                     | 4 (0.2) <sup>m</sup>                     | 9.4                     | 3.6-24.3            | 1.0                       |                       |
|                                     | >6-12 months                | 3 (0.2) <sup>h</sup>                     | 57.7                    | 6.7, 495.9          | 2.3                       | 0.34, 15.3             | 3 (0.98) <sup>k</sup>                    | 27.6                    | 13.5, 56.4          | 2.0                       | 0.53, 7.9           | 4 (0.4) <sup>n</sup>                     | 13.0                    | 4.8-35.0            | 2.0                       | 0.66-6.0              |
|                                     | >12 months                  | 2 (0.4) <sup>i</sup>                     | 667.9                   | 264.1, 1,689.1      | 31.1                      | 11.0, 87.6             | 4 (0.3) <sup>l</sup>                     | 63.2                    | 39.1, 102.0         | 4.2                       | 1.4, 12.8           | 3 (0.96) <sup>o</sup>                    | 17.9                    | 6.9-46.6            | 2.8                       | 0.95-8.1              |
| HPV group                           | Overall HPV                 | 5 (<0.001) <sup>p</sup>                  | 104.2                   | 11.9, 912.1         | 1.0                       |                        | 3 (0.5) <sup>s</sup>                     | 37.8                    | 24.0, 59.6          | 1.0                       |                     | 4 (0.9) <sup>v</sup>                     | 13.3                    | 6.2-28.5            | 1.0                       |                       |
|                                     | Carcinogenic                | 5 (0.4) <sup>q</sup>                     | 30.6                    | 17.7, 59.2          | 0.57                      | 0.05, 6.6 <sup>‡</sup> | 5 (0.01) <sup>t</sup>                    | 20.3                    | 6.5, 62.9           | 0.42                      | 0.11, 1.8           | 8 (0.1) <sup>w</sup>                     | 15.4                    | 6.2-38.2            | 1.0                       | 0.28-3.9 <sup>‡</sup> |
|                                     | HPV16/18                    | 2 (0.2) <sup>r</sup>                     | 26.3                    | 11.4, 60.8          | 0.35                      | 0.02, 7.4 <sup>‡</sup> | 3 (0.08) <sup>u</sup>                    | 50.5                    | 17.6, 144.8         | 1.4                       | 0.37, 5.6           | 3 (0.1) <sup>x</sup>                     | 15.5                    | 3.0-80.6            | 1.2                       | 0.22-6.5 <sup>‡</sup> |
| Type-specific persistence           | No                          | 7 (0.02) <sup>y</sup>                    | 102.4                   | 27.0, 388.1         | 1.0                       |                        | 6 (<0.001) <sup>aa</sup>                 | 27.3                    | 9.9, 75.1           | 1.0                       |                     | 8 (0.7) <sup>cc</sup>                    | 16.0                    | 18.4-30.4           | 1.0                       |                       |
|                                     | Yes                         | 3 (<0.001) <sup>z</sup>                  | 74.0                    | 5.2, 1,061.1        | 0.77                      | 0.07, 8.9 <sup>‡</sup> | 3 (0.08) <sup>bb</sup>                   | 50.5                    | 17.6, 144.8         | 1.9                       | 0.42, 8.3           | 5 (0.07) <sup>dd</sup>                   | 14.9                    | 4.6-48.9            | 0.66                      | 0.21-2.0 <sup>‡</sup> |
| HPV detection method                | Non-PCR                     | 3 (0.3) <sup>ee</sup>                    | 36.5                    | 9.4, 141.3          | 1.0                       |                        | 3 (0.02) <sup>gg</sup>                   | 26.5                    | 2.4, 286.1          | 1.0                       |                     | 4 (0.5) <sup>ii</sup>                    | 29.9                    | 9.0-99.4            | 1.0                       |                       |
|                                     | PCR                         | 6 (<0.001) <sup>ff</sup>                 | 99.4                    | 15.2, 652.1         | 2.4                       | 0.19, 31.5             | 8 (0.06) <sup>hh</sup>                   | 38.5                    | 23.9, 62.2          | 3.2                       | 0.91, 10.9          | 9 (0.2) <sup>jj</sup>                    | 11.4                    | 6.2-20.9            | 0.37                      | 0.09-1.6              |
| Outcome diagnosis                   | Not histology only          | 4 (<0.001) <sup>kk</sup>                 | 108.2                   | 10.6, 1,107.5       | 1.0                       |                        | 4 (0.6) <sup>mm</sup>                    | 35.3                    | 23.2, 53.6          | 1.0                       |                     | 5 (0.6) <sup>oo</sup>                    | 15.7                    | 7.8-31.8            | 1.0                       |                       |
|                                     | Histology only <sup>§</sup> | 5 (0.5) <sup>ll</sup>                    | 49.4                    | 17.0, 143.6         | 0.51                      | 0.05, 5.4              | 7 (<0.001) <sup>nn</sup>                 | 32.8                    | 10.2, 105.3         | 0.94                      | 0.25, 3.5           | 9 (0.06) <sup>pp</sup>                   | 18.7                    | 7.2-48.5            | 0.95                      | 0.27-3.4 <sup>‡</sup> |
| Baseline cervical status            | Normal/lesions              | 2 (0.3) <sup>qq</sup>                    | 82.7                    | 9.9, 693.0          | 1.0                       |                        | 4 (0.01) <sup>tt</sup>                   | 55.3                    | 17.5, 174.3         | 1.0                       |                     | 3 (0.1) <sup>ww</sup>                    | 10.8                    | 2.3-51.0            | 1.0                       |                       |
|                                     | Normal/ASCUS                | 2 (0.9) <sup>rr</sup>                    | 12.7                    | 3.3, 49.3           | 0.16                      | 0.004, 6.2             | 1 (NA) <sup>uu</sup>                     | NA <sup>¶</sup>         | NA <sup>¶</sup>     |                           |                     | 2 (0.98) <sup>xx</sup>                   | 14.3                    | 3.1-65.4            | 2.4                       | 0.48-11.8             |
|                                     | Normal                      | 5 (<0.001) <sup>ss</sup>                 | 141.0                   | 19.8, 1,004.7       | 1.7                       | 0.08, 36.5             | 5 (0.8) <sup>vv</sup>                    | 35.4                    | 23.5, 53.3          | 0.64                      | 0.24, 1.7           | 8 (0.6) <sup>yy</sup>                    | 18.4                    | 9.8-37.7            | 3.1                       | 1.4-6.9               |
| Mean/median age of study population | ≤35 years                   | 4 (<0.001) <sup>zz</sup>                 | 57.7                    | 5.9, 563.9          | 1.0                       |                        | 4 (0.4) <sup>bbb</sup>                   | 32.5                    | 21.5, 49.1          | 1.0                       |                     | 4 (0.2) <sup>ddd</sup>                   | 9.6                     | 4.4-21.7            | 1.0                       |                       |
|                                     | >35 years                   | 4 (0.4) <sup>aaa</sup>                   | 76.6                    | 19.1, 308.2         | 1.1                       | 0.08, 16.0             | 5 (0.03) <sup>ccc</sup>                  | 26.4                    | 6.0, 116.8          | 0.58                      | 0.16, 2.1           | 6 (0.6) <sup>eee</sup>                   | 20.9                    | 7.3-59.5            | 2.3                       | 0.61-8.6              |

\* CIN2-3/HSIL+ = high-grade cervical intraepithelial neoplasia, high-grade squamous intraepithelial lesions, and invasive cancer.

<sup>†</sup> CI = confidence interval.

<sup>‡</sup> At least one study contributed effect estimates to more than one category. Thus, observations are not independent and confidence intervals may be inaccurate.

<sup>§</sup> One study included one case (out of 9) that had no data on histology available.(54)

<sup>¶</sup> NA = not applicable

<sup>a</sup> (37, 51, 53, 54, 62, 67), <sup>b</sup> (16, 102), <sup>c</sup> (37, 51, 53-55), <sup>d</sup> (14, 16, 27, 56, 102), <sup>e</sup> (11, 32, 37, 51-54, 75), <sup>f</sup> (16, 29, 39, 102), <sup>g</sup> (62, 67, 102), <sup>h</sup> (51, 53, 54), <sup>i</sup> (16, 37), <sup>j</sup> (27, 55, 102), <sup>k</sup> (51, 53, 54), <sup>l</sup> (14, 16, 37, 56), <sup>m</sup> (11, 52, 75, 102), <sup>n</sup> (32, 51, 53, 54), <sup>o</sup> (16, 37, 39), <sup>p</sup> (16, 37, 51, 62, 67), <sup>q</sup> (37, 53, 54, 62, 102), <sup>r</sup> (30, 62), <sup>s</sup> (16, 37, 51), <sup>t</sup> (27, 53-55, 102), <sup>u</sup> (14, 31, 56), <sup>v</sup> (16, 37, 38, 51), <sup>w</sup> (11, 32, 39, 52-54, 60, 102), <sup>x</sup> (29, 38, 75), <sup>y</sup> (16, 37, 51, 54, 62, 67, 102), <sup>z</sup> (30, 37, 62), <sup>aa</sup> (16, 37, 51, 54, 55, 102), <sup>bb</sup> (14, 31, 56), <sup>cc</sup> (11, 16, 32, 37, 38, 51, 54, 102), <sup>dd</sup> (29, 39, 52, 60, 75), <sup>ee</sup> (54, 67, 102), <sup>ff</sup> (16, 30, 37, 51, 53, 62), <sup>gg</sup> (54, 55, 102), <sup>hh</sup> (14, 16, 27, 31, 37, 51, 53, 56), <sup>ii</sup> (11, 32, 54, 102), <sup>jj</sup> (16, 29, 37, 39, 51-53, 60, 75), <sup>kk</sup> (30, 37, 51, 62), <sup>ll</sup> (16, 53, 54, 67, 102), <sup>mm</sup> (31, 37, 51, 56), <sup>nn</sup> (14, 16, 27, 53-55, 102), <sup>oo</sup> (11, 32, 37, 39, 51), <sup>pp</sup> (16, 29, 32, 52-54, 60, 75, 102), <sup>qq</sup> (53, 102), <sup>rr</sup> (54, 62), <sup>ss</sup> (16, 30, 37, 51, 67), <sup>tt</sup> (14, 27, 53, 102), <sup>uu</sup> (54), <sup>vv</sup> (16, 31, 37, 51, 54, 56), <sup>ww</sup> (52, 53, 102), <sup>xx</sup> (11, 54), <sup>yy</sup> (16, 29, 32, 37, 39, 51, 60, 75), <sup>zz</sup> (30, 37, 62, 67), <sup>aaa</sup> (16, 53, 54, 102), <sup>bbb</sup> (27, 31, 37, 56), <sup>ccc</sup> (16, 53-55, 102), <sup>ddd</sup> (11, 37, 39, 52), <sup>eee</sup> (16, 32, 53, 54, 75, 102)
